# Supplementary material for: A systematic review of meta-analyses in second language research: current practices, issues, and recommendations
Source: publisher site journal article supplement (doi:10.1515/applirev-2022-0192), 2023-01-10
Supplement: Supplementary file 1 [file j_applirev-2022-0192_suppl.docx]

Impact factor of each journal as well as the number of meta-analyses contributed to the dataset.

| **Journal** | **n** | **Impact factor** |
| --- | --- | --- |
| *Applied Lingustics* | 3 | 5.741 |
| *Applied Psycholinguistics* | 2 | 1.838 |
| *The Asia-Pacific Education Researcher* | 1 | 2.409 |
| *Australasian Journal of Educational Technology* | 1 | 3.067 |
| *British Journal of Educational Psychology* | 1 | 3.241 |
| *British Journal of Educational Technology* | 3 | 4.929 |
| *Computer Assisted Language Learning* | 6 | 4.789 |
| *Computers & Education* | 1 | 8.538 |
| *Early Education and Development* | 1 | 2.175 |
| *Educational Psychology Review* | 3 | 8.705 |
| *Educational Research Review* | 2 | 7.803 |
| *Educational Technology & Society* | 1 | 3.522 |
| *Educational Technology Research and Development* | 1 | 3.565 |
| *Foreign Language Annals* | 1 | 2.067 |
| *Frontiers in Psychology* | 1 | 2.988 |
| *Heliyon* | 1 | 0.46 |
| *International Journal of Applied Linguistics* | 1 | 1.267 |
| *International Journal of Corpus Linguistics* | 1 | 1.059 |
| *International Journal of Lexicography* | 1 | 0.721 |
| *IRAL-International Review of Applied Linguistics in Language Teaching* | 1 | 0.97 |
| *Journal of Educational and Behavioral Statistics* | 1 | 3.288 |
| *Journal of Educational Computing Research* | 3 | 3.088 |
| *Journal of Learning Disabilities* | 1 | 2.859 |
| *Journal of Literacy Research* | 1 | 2.918 |
| *Journal of Psycholinguistic Research* | 1 | 1.18 |
| *Journal of Research in Reading* | 1 | 2.542 |
| *Journal of Research on Educational Effectiveness* | 1 | 2.5 |
| *Journal of Second Language Writing* | 3 | 3.538 |
| *Journal of Speech, Language, and Hearing Research* | 1 | 2.297 |
| *Language Learning* | 16 | 4.667 |
| *Language Learning & Technology* | 6 | 4.313 |
| *Language Learning and Development* | 1 | 1 |
| *Language Teaching Research* | 11 | 3.899 |
| *Language Testing* | 2 | 3.551 |
| *The Modern Language Journal* | 6 | 4.759 |
| *Psychological Bulletin* | 1 | 17.737 |
| *Psychological Reports* | 1 | 2.053 |
| *Psychonomic Bulletin & Review* | 1 | 5.536 |
| *Reading and Writing* | 1 | 2.87 |
| *ReCALL* | 4 | 2.917 |
| *Review of Educational Research* | 3 | 12.565 |
| *SAGE Open* | 1 | 0.74 |
| *Second Language Research* | 1 | 2.178 |
| *Studies in Second Language Acquisition* | 9 | 3.988 |
| *Studies in Second Language Learning and Teaching* | 1 | 3.036 |
| *System* | 6 | 3.167 |
| *TESOL Quarterly* | 3 | 3.692 |

*PRISMA Flow Diagram of the search, inclusion, and exclusion process.*

Records removed *before screening*:

Records marked as ineligible by database tools (n = 462,050)

Records removed for other reasons (n = 0)

Records identified from:

Databases in total (n = 465,693)

LLBA (n = 546)

PsychINFO (n = 17,934)

ERIC (n = 88,213)

Google Scholar (n = 359,000)

Registers (n = 4,095)

**Identification**

Records screened

(n 7,738)

Records excluded

(n = 7,499)

Reports not retrieved

(n = 0)

Reports sought for retrieval

(n = 239)

**Screening**

Total reports excluded based on inclusion criteria: (n = 119)

Reports assessed for eligibility

(n = 239)

Studies included in review

(n = 120)

**Included**

The number of studies reporting different justifications for conducting their meta-analysis

| **Justification** | n |
| --- | --- |
| First meta-analysis on the topic | 29 |
| No mention of previous meta-analyses on the topic | 25 |
| Different moderators than previous meta-analyses | 18 |
| Different approach/lens than previous meta-analyses (e,g., what was a moderator is now the primary variable) | 18 |
| Shortcomings of previous meta-analyses | 15 |
| Update to previous meta-analyses to include current research | 15 |
| Different focus than previous meta-analyses (e.g., speaking to writing) | 13 |
| Different inclusion criteria than previous meta-analyses | 9 |
| Different context than previous meta-analyses | 7 |
| Include more studies than previous meta-analyses | 2 |
| More transparent reporting than previous meta-analyses | 2 |
| Different task types than previous meta-analyses | 1 |
| Different model than previous meta-analyses | 1 |

Databases searched and the number of meta-analyses employing each database.

| **Database** | **N** |
| --- | --- |
| Academic Search Premier | 8 |
| Academic Search Complete | 4 |
| Academic search elite | 2 |
| Academic Search Ultimate | 3 |
| Applied Social Science Abstracts | 1 |
| Applied Social Sciences Index | 1 |
| ArticleFirst | 1 |
| Arts & Humanities Citation Index | 1 |
| Arts & Humanities Search | 1 |
| AskZad | 1 |
| Baidu Scholar | 1 |
| Baidu XUESHU | 1 |
| Book Review Digest | 1 |
| British Education Index | 1 |
| Business Source Premier | 1 |
| Cambridge Collection Online | 1 |
| Cambridge Core | 2 |
| Cambridge Scientific Abstracts (CSA Illumina) | 1 |
| Child Abuse and Child Welfare Database | 1 |
| China National Knowledge Infrastructure (CNKI) | 3 |
| Chinese Electronic Thesis & Dissertations Service (CETD) | 1 |
| Chinese periodical index | 2 |
| Cochrane Library (the) | 1 |
| ComDisDome | 1 |
| Communication Abstracts | 1 |
| Communication and Mass Media Complete | 1 |
| Communication Source | 1 |
| Computer Source | 1 |
| CSA Illumina | 2 |
| Current contents | 1 |
| DBPIA | 1 |
| Directory of Open Access Journals online | 3 |
| Dissertation Abstract International | 3 |
| Dissertation Abstracts | 10 |
| Dissertation and Thesis Abstract System of Taiwan | 2 |
| Dissertation Discovery System | 1 |
| EBSCO Discovery Service | 1 |
| EBSCO Host | 12 |
| Education (SAGE) | 1 |
| Education abstracts | 4 |
| Education Abstracts Full Text | 2 |
| Education full texts | 9 |
| Education Research Complete | 3 |
| Education Source | 2 |
| Education Collection | 1 |
| Educational Administration Abstracts | 1 |
| ELSEVIER | 1 |
| Embase | 1 |
| Emerging Sources Citation Index | 1 |
| ERIC | 111 |
| EricData | 1 |
| Family & Society Studies Worldwide | 1 |
| GeNii (Japanese database) | 1 |
| Google | 21 |
| Google Scholar | 67 |
| Health Source: Consumer Edition | 1 |
| Health Source: Nursing/Academic Edition | 1 |
| Hispanic American Periodicals Index | 1 |
| Hong Kong University Theses Online | 1 |
| Humanities abstracts | 1 |
| IBSS | 1 |
| IEEE Xplore | 3 |
| IGI | 1 |
| Ingenta | 1 |
| Inspec | 1 |
| IRIS | 2 |
| JSTOR | 14 |
| JSTOR Arts & Sciences | 1 |
| JSTOR Arts and Sciences III Collection | 2 |
| JSTOR Arts and Sciences IV Collection | 1 |
| Library & Info. Science Abstracts | 1 |
| Library Literature and Information Science | 1 |
| LingRef | 1 |
| Linguistics Abstracts online | 1 |
| Linguistics and Language (CSA) | 1 |
| LLBA | 77 |
| Medline | 6 |
| Military & Government Collection | 1 |
| MLA | 4 |
| MLA bibliography | 3 |
| MLA international bibliography | 7 |
| National Digital Library of Theses and Dissertations in Taiwan | 1 |
| national library of the research team’s country | 1 |
| Networked Digital Library of Theses and Dissertations (NDLTD) | 1 |
| Online Computer Library Center | 1 |
| Open Access Journals | 1 |
| OpenDissertations | 1 |
| Ovid databases | 1 |
| Periodicals Archive Online | 1 |
| Professional Development Collection | 2 |
| Project MUSE | 2 |
| ProQuest | 20 |
| Proquest Central | 1 |
| Proquest dissertations and Theses or Proquest Global Dissertations | 52 |
| ProQuest Education Journals | 3 |
| ProQuest Ethnic News Watch | 1 |
| Proquest Humanities | 1 |
| Proquest International | 1 |
| ProQuest Linguistics | 2 |
| Proquest Multicultural | 1 |
| ProQuest Psychology Journals | 5 |
| Proquest Research Library | 1 |
| Proquest Social Science Journals | 3 |
| PsycArticles | 19 |
| PsychAPA | 1 |
| PsychExtra | 1 |
| PsychLit | 1 |
| Psychology and Behavioral Sciences collection | 1 |
| PsycINFO | 66 |
| Pubmed | 4 |
| Regional Business News | 1 |
| SAGE | 2 |
| SAGE Journals | 2 |
| SAGE Journals Premier | 1 |
| Scholars portal | 1 |
| Science Direct | 10 |
| Scirus | 1 |
| Scopus | 10 |
| Social Science Citation Index | 8 |
| Social Sciences abstracts | 2 |
| Social Service Abstracts | 1 |
| Sociological Abstracts | 3 |
| Springer | 2 |
| Springer journal archives | 4 |
| Springer Link | 1 |
| TOC Premier | 1 |
| university library local catalogue | 3 |
| VARGA | 2 |
| Web of Knowledge | 2 |
| Web of Science | 26 |
| Web of Science Core Collection | 4 |
| Wiley | 1 |
| Wiley Online Library | 2 |
| Wilson OmniFile full text select | 1 |
| WorldCat | 1 |

Journals and the number of meta-analyses that manually searched each for primary literature

| **Journal searched** | **n** |
| --- | --- |
| *APACALL* | 1 |
| *Alsic* | 1 |
| *American Educational Research Journal* | 5 |
| *Annals of Dyslexia* | 1 |
| *Annual Review of Applied Linguistics* | 2 |
| *Annual Review of English Language Education in Japan* | 1 |
| *Applied Language Learning* | 2 |
| *Applied Linguistics* | 24 |
| *Applied Linguistics Review* | 1 |
| *Applied Psycholinguistics* | 8 |
| *Asian EFL Journal* | 2 |
| *Asian ESP Journal* | 1 |
| *Asian TEFL* | 1 |
| *Australasian Journal of Educational Technology* | 1 |
| *Australian Review of Applied Linguistics* | 1 |
| *Bilingual Research Journal* | 3 |
| *Bilingualism: Language and Cognition* | 6 |
| *British Journal of Educational Technology* | 7 |
| *CALICO* | 19 |
| *CALL-EJ Online* | 4 |
| *Cambridge Journals* | 1 |
| *Canadian Modern Language* | 2 |
| *Canadian Modern Language Review* | 15 |
| *Computer Assisted Language Learning* | 24 |
| *Computer Supported Cooperative Work* | 1 |
| *Computers & Education* | 11 |
| *Computers in Education Journal* | 1 |
| *Computers in the Schools* | 1 |
| *Contemporary Educational Psychology* | 1 |
| *Discourse Processes* | 1 |
| *Dutch Journal of Applied Linguistics* | 1 |
| *Education Technology & Society* | 3 |
| *Educational Psychology Review* | 1 |
| *Educational Technology Research & Development* | 5 |
| *Electronic Journal of Foreign Language Teaching* | 1 |
| *Elementary School Journal* | 1 |
| *English for Academic Purposes* | 1 |
| *English for Specific Purposes* | 3 |
| *English Language Teaching Journal* | 3 |
| *English Teaching* | 1 |
| *English Teaching and Learning* | 1 |
| *Foreign Language Annals* | 19 |
| *Forum for Modern Language Studies* | 1 |
| *Frontiers: The Interdisciplinary Journal of Study Abroad* | 2 |
| *Hispania* | 1 |
| *IALLT* | 1 |
| *Indonesian Journal of Applied Linguistics* | 1 |
| *Innovation in Language Learning and Teaching* | 1 |
| *International Journal of Applied Linguistics* | 2 |
| *International Journal of Bilingual Education and Bilingualism* | 2 |
| *International Journal of Bilingual Education and Bilingualism* | 1 |
| *International Journal of Bilingualism* | 2 |
| *International Journal of Bilingualism* | 1 |
| *International Journal of Comptuer-Assisted Language Learning and Teaching* | 2 |
| *International Journal of Educational Research* | 3 |
| *International Journal of Educational Technology in Higher Education* | 1 |
| *International Journal of Lexicography* | 1 |
| *International Journal of Mobile and Blended Learning* | 1 |
| *International Journal of Multilingualism* | 1 |
| *International Multilingual Research Journal* | 1 |
| *International Review of Applied Linguistics* | 7 |
| *International Review of Applied Linguistics in Language* | 1 |
| *International Review of Applied Linguistics in Language Teaching* | 1 |
| *Iranian Journal of Language Teaching Research* | 1 |
| *ITL - International Journal of Applied Linguistics* | 1 |
| *JALT CALL Journal* | 3 |
| *JALT Journal* | 2 |
| *Japan Association for Language Teaching Journal* | 1 |
| *Japan Association of College English Teachers Journal* | 1 |
| *Japan Language Testing Association Journal* | 1 |
| *Journal of Acoustical Society of America* | 1 |
| *Journal of Adolescent and Adult Literacy* | 2 |
| *Journal of Applied Linguistics* | 3 |
| *Journal of Asia TEFL* | 1 |
| *Journal of Computer-assisted Instruction* | 1 |
| *Journal of Computer-assisted Learning* | 5 |
| *Journal of Curriculum and Instruction* | 1 |
| *Journal of East Asian Linguistics* | 1 |
| *Journal of Education Psychology* | 2 |
| *Journal of Educational Computing Research* | 1 |
| *Journal of Educational Computing & Research* | 2 |
| *Journal of Educational Psychology* | 4 |
| *Journal of Educational Research* | 2 |
| *Journal of Educational Technology and Society* | 1 |
| *Journal of Educational Technology Systems* | 1 |
| *Journal of English for Academic Purposes* | 1 |
| *Journal of Language, Identity, and Education* | 1 |
| *Journal of Learning* | 1 |
| *Journal of Learning Disabilities* | 1 |
| *Journal of Memory and Language* | 1 |
| *Journal of Multilingual and Multicultural Development* | 1 |
| *Journal of Phonetics* | 1 |
| *Journal of Psycholinguist Research* | 2 |
| *Journal of Reading* | 1 |
| *Journal of Research in Reading* | 2 |
| *Journal of Research on Computing in Education* | 1 |
| *Journal of Research on Educational Effectiveness* | 1 |
| *Journal of Second Language Pronunciation* | 1 |
| *Journal of Second Language Writing* | 7 |
| *Journal of Special Education* | 1 |
| *Journal of the Midwest Modern Language Association* | 1 |
| *Kanto-koshinetsu Association of Teachers of English Journal* | 1 |
| *Language* | 1 |
| *Language Acquisition* | 1 |
| *Language and Cognitive Processes* | 1 |
| *Language and Education* | 2 |
| *Language Assessment Quarterly* | 3 |
| *Language Awareness* | 1 |
| *Language Education and Technology* | 1 |
| *Language Learning* | 32 |
| *Language Learning & Technology* | 23 |
| *Language Learning and Development* | 1 |
| *Language Learning Journal* | 1 |
| *Language Sciences* | 1 |
| *Language Teaching* | 1 |
| *Language Teaching and Learning* | 1 |
| *Language Teaching Research* | 18 |
| *Language Testing* | 9 |
| *Language, Culture and Curriculum* | 1 |
| *Language, Interaction and Acquisition* | 1 |
| *Learning and Individual Differences* | 1 |
| *Learning Disabilities Research & Practice* | 1 |
| *Learning Disabilities Quarterly* | 1 |
| *Lexikos* | 1 |
| *Linguistic Approaches to Bilingualism* | 1 |
| *MALL* | 1 |
| *Modern Language Journal* | 30 |
| *Modern Language Notes* | 1 |
| *Modern Language Quarterly* | 1 |
| *Modern Language Review* | 1 |
| *PacCALL* | 1 |
| *Phonetica* | 1 |
| *Phonology* | 1 |
| *Reading and Writing Quarterly* | 2 |
| *Reading in a Foreign Language* | 5 |
| *Reading Matrix* | 2 |
| *Reading Psychology* | 1 |
| *Reading Research Quarterly* | 5 |
| *ReCALL* | 17 |
| *RELC Journal* | 6 |
| *Remedial and Special Education* | 1 |
| *Research in the Teaching of English* | 1 |
| *Scientific Studies of Reading* | 1 |
| *Second Language Research* | 17 |
| *Second Language Writing* | 2 |
| *Southern African Linguistics and Applied Language Studies* | 1 |
| *Spanish Applied Linguistics* | 1 |
| *Studies in English Language and Literature* | 1 |
| *Studies in Second Language Acquisition* | 31 |
| *Studies in Second Language Learning and Teaching* | 1 |
| *System* | 27 |
| *Taiwan Journal of TESOL* | 2 |
| *Teaching English with Technology* | 1 |
| *TESL-EJ* | 1 |
| *TESOL Canada* | 1 |
| *TESOL Journal* | 1 |
| *TESOL Quarterly* | 36 |
| *Theory and Practice in Language Studies* | 1 |
| *Transactions of the Philological Society* | 1 |
| *Vigo International Journal of Applied Linguistics* | 1 |

Conference programs and proceedings searched and the number of meta-analyses that searched each for primary literature

| **Conference programs** | **N** |
| --- | --- |
| AAAL Conference Programs | 2 |
| The IELTS Research Report Series | 1 |
| International Congress of Phonetic Sciences | 1 |
| Pronunciation in Second Language Learning and Teaching Conference | 3 |
| The Second Language Research Forum | 1 |
| The TBLT Conference PowerPoint Repository | 1 |

Tests for publication bias and the number of meta-analyses using each.

| Test of Publication Bias | *n* |
| --- | --- |
| Funnel plot | 64 |
| Trim-and-fill | 27 |
| Fail-safe N (unspecified) | 24 |
| Egger's test | 17 |
| Classic fail-safe N | 13 |
| Orwin's fail-safe N | 9 |
| Publication status included as a moderator variable | 8 |
| Begg's rank test | 4 |
| Rosenthal’s fail-safe N | 2 |
| Centroid plot of rank correlation | 2 |
| STRATA 14 | 1 |
| Kendall's Tau | 1 |
| ROBINS-I rating scale | 1 |
| Vevea & Hedges weighted function | 1 |
| P-curve | 1 |
| Selection models in JASP | 1 |
| Cook's distance | 1 |
| Forest plot | 1 |

Tests for outlier identification and the number of meta-analyses using each.

| **Tests and Thresholds for Outlier Identification** | ***n*** |
| --- | --- |
| Sensitivity analyses | 8 |
| z > 2 | 5 |
| z > 3 | 5 |
| Funnel plot | 4 |
| Over 1.5 times the interquartile range | 2 |
| Forest plot | 2 |
| Over 2 times the interquartile range | 1 |
| Baujat plot and sensitivity analysis | 1 |
| Cook's distance > .85 | 1 |
| d > 1.5 | 1 |
| d > 5 | 1 |
| Grubb's test | 1 |
| Multiple tests of homogeneity | 1 |
| Residual > 2.5 | 1 |
| trim-and-fill | 1 |
| z > 2.5 | 1 |

Note: Two studies (Boulton & Cobb, 2017; Chen et al., 2022) used two methods to identify outliers. Therefore, the total *n* exceeds the number of meta-analyses in this paper.

Software used for meta-analyzing data and the number of studies using each.

| **Software used** | ***n*** |
| --- | --- |
| CMA | 47 |
| Becker's (1999) effect size calculator | 1 |
| EndNote X7 | 1 |
| EPPI-reviewer | 1 |
| Excel - meta-essentials | 0 |
| Excel/spreadsheet | 2 |
| Exploratory Software for Confidence Intervals (ESCI) | 2 |
| HLM | 1 |
| JASP - only for graph production | 4 |
| Matching | 1 |
| MatchIt | 1 |
| meta-essentials | 1 |
| R - bayesmeta | 1 |
| R - clubSandwich | 3 |
| R - dmetar | 1 |
| R - meta | 1 |
| R - metafor | 16 |
| R - metaSEM | 1 |
| R - no package specified | 1 |
| R - robumeta | 3 |
| R - weightr | 1 |
| R ggplot - only for graph production | 1 |
| rbound | 1 |
| SPSS | 5 |
| STATA 14 with meglm command | 0 |
| STATA 14 with metan command | 0 |
| Wilson's (2001) Effect Size Determination Program | 1 |

References for meta-analyses included in the synthesis

Abraham, L. B. (2008). Computer-mediated glosses in second language reading comprehension and vocabulary learning: A meta-analysis. *Computer Assisted Language Learning, 21*(3), 199–226. <http://dx.doi.org/10.1080/09588220802090246>

Adescope, O. O., Lavin, T., Thompson, T., & Ungerleider, C. (2011). Pedagogical strategies for teaching literacy to ESL immigrant students: A meta-analysis. *British Journal of Educational Psychology, 81*, 629–653. <http://dx.doi.org/10.1111/j.2044-8279.2010.02015.x>

Al-Hoorie, A. H. (2018). The L2 motivational self system: A meta-analysis. *Studies in Second Language Learning and Teaching, 8*(4), 721–754. <http://dx.doi.org/10.14746/ssllt.2018.8.4.2>

Ardasheva, Y., Wang, Z., Adescope, O. O., & Valentine, J. C. (2017). Exploring effectiveness and moderators of language learning strategy instruction on second language and self-regulated learning outcomes. *Review of Educational Research, 87*(3), 544–582. <http://dx.doi.org/10.3102/0034654316689135>

Avery, N., & Marsden, E. (2019). A meta-analysis of sensitivity to grammatical information during self-paced reading: Towards a framework of reference for reading time effect sizes. *Studies in Second Language Acquisition, 41,* 1055–1087. <http://dx.doi.org/10.1017/S0272263119000196>

Bibauw, S., François, T., Van den Noortgate, W., & Desmet, P. (2022). Dialogue systems for language learning: A meta-analysis. *Language Learning & Technology, 26*(1).

Boulton, A., & Cobb, T. (2017). Corpus use in language learning: A meta-analysis. *Language Learning, 67*(2), 348–393. <http://dx.doi.org/10.1111/lang.12224>

Brown, A. V., Plonsky, L., & Teimouri, Y. (2018). The use of course grades as metrics in L2 research: A systematic review. *Foreign Language Annals, 51,* 763–778. <http://dx.doi.org/10.1111/flan.12370>

Brown, D. (2016). The type and linguistic foci of oral corrective feedback in the L2 classroom: A meta-analysis. *Language Teaching Research, 20*(4) 436–458. <http://dx.doi.org/10.1177/1362168814563200>

Bryfonski, L., & McKay, T. H. (2019). TBLT implementation and evaluation: A meta-analysis. *Language Teaching Research, 23*(5) 603–632. <https://doi.org/10.1177%2F1362168817744389>

Chang, M.-M., & Hung, H.-T. (2019). Effects of technology-enhanced language learning on second language acquisition: A meta-analysis. *Educational Technology & Society, 22*(4), 1–17. <https://www.jstor.org/stable/26910181>

Chang, M.-M., & Lin, M.-C. Strategy-oriented web-based English instruction – A meta-analysis. *Australasian Journal of Educational Technology, 29*(2), 203-216. <https://doi.org/10.14742/ajet.67>

Chen, M.-H., Tseng, W.-T., & Hsiao, T.-Y. (2018). The effectiveness of digital game-based vocabulary learning: A framework-based view of meta-analysis. *British Journal of Educational Technology, 49*(1), 69–77. https://doi.org/10.1111/bjet.12526

Chen, X., He., J., Swanson, E., Cai, Z., & Fan, X. (2021). Big five personality traits and second language learning: A meta‑analysis of 40 years’ research. *Educational Psychology Review, 34,* 851–887. <https://doi.org/10.1007/s10648-021-09641-6>

Cheung, A. C. K., & Slavin, R. E. (2012). Effective reading programs for Spanish-dominant English language learners (ELLs) in the elementary grades: A synthesis of research. *Review of Educational Research, 82*(4), 351–395. <https://doi.org/10.3102/0034654312465472>

Chiu, Y.-H. (2013). Computer-assisted second language vocabulary instruction: A meta-analysis. *British Journal of Educational Technology, 44*(2), E52–E56. <https://doi.org/10.1111/j.1467-8535.2012.01342.x>

Chiu, Y.-H., Kao, C.-W., & Reynolds, B. L. (2012). The relative effectiveness of digital game-based learning types in English as a foreign language setting: A meta-analysis. *British Journal of Educational Technology, 43*(4), E104–E107. [https://doi.org/10.1111/j.1467-8535.2012.01295.x](https://doi.org/10.1111/j.1467-8535.2012.01342.x)

Cho, Y., Kim, D., & Jeong, S. (2021). Evidence-based reading interventions for English language learners: A multilevel meta-analysis. *Heliyon, 7*(9), E07985. <https://doi.org/10.1016/j.heliyon.2021.e07985>

Cole, M. W. (2014). Speaking to read: Meta-analysis of peer-mediated learning for English language learners. *Journal of Literacy Research, 46*(3), 358–382. <https://doi-org.proxy.lib.fsu.edu/10.1177%2F1086296X14552179>

Dalman, M., & Plonsky, L. (2022). The effectiveness of second-language listening strategy instruction: A meta-analysis. *Language Teaching Research.* <https://doi.org/10.1177%2F13621688211072981>

de Vos, J. F., Schriefers, H. Nivard, M. G., & Lemhöfer, K. (2018). A meta-analysis and meta-regression of incidental second language word learning from spoken input. *Language Learning, 68*(4), 906–941. <https://doi.org/10.1111/lang.12296>

Dixon, D. H., Dixon, T., & Jordan, E. (2022). Second language (L2) gains through digital game-based language learning (DGBLL): A meta-analysis. *Language Learning & Technology, 26*(1), 1–25. <http://hdl.handle.net/10125/73464>

Dixon, T., Christison, M., Dixon, D. H., & Palmer, A. S. (2021). A meta-analysis of hybrid language instruction and call for future research. *The Modern Language Journal, 105*(4), 792–809. <https://doi.org/10.1111/modl.12732>

Dong, Y., & Chow, B. W.-Y. (2022). Home literacy environment and English as a second language acquisition: A meta-analysis. *Language Learning and* *Development.* <https://doi.org/10.1080/15475441.2021.2003197>

Durrant, P. (2014). Corpus frequency and second language learners' knowledge of collocations: A meta-analysis. *International Journal of Corpus Linguistics, 19*(4), 443–477. <https://doi.org/10.1075/ijcl.19.4.01dur>

Elabdali, R. (2021). Are two heads really better than one? A meta-analysis of the L2 learning benefits of collaborative writing. *Journal of Second Language Writing, 52*, 100788. <https://doi.org/10.1016/j.jslw.2020.100788>

Faez, F., Karas, M., & Uchihara, T. (2021). Connecting language proficiency to teaching ability: A meta-analysis. *Language Teaching Research, 25*(5) 754–777. <https://doi.org/10.1177%2F1362168819868667>

Fitton, L., McIlraith, A. L., & Wood, C. L. (2018). Shared book reading interventions with English learners: A meta-analysis. *Review of Educational Research, 88*(5), 712–751. <https://doi.org/10.3102%2F0034654318790909>

Goldschneider, J. M., & DeKeyser, R. M. (2001). Explaining the “natural order of L2 morpheme acquisition” in English: A meta-analysis of multiple determinants. *Language Learning, 51*(1), 1-50. <https://doi.org/10.1111/1467-9922.00147>

Grgurović, M., Chapelle, C. A., & Shelley, M. C. (2013). A meta-analysis of effectiveness studies on computer technology-supported language learning. *ReCALL, 25*(2), 165–198. <https://doi.org/10.1017/S0958344013000013>

Hall, C., Roberts, G. J., Cho, E., McCulley, L. V., Carrol, M., & Vaughn, S. (2017). Reading instruction for English learners in the middle grades: a meta-analysis. *Educational Psychology Review, 29*, 763–794. <https://doi.org/10.1007/s10648-016-9372-4>

Hamada, A. (2020). Using meta-analysis and propensity score methods to assess treatment effects toward evidence-based practice in extensive reading. *Frontiers in Psychology, 11,* 617. <https://doi.org/10.3389/fpsyg.2020.00617>

Hao, T., Wang, Z., & Ardasheva, Y. (2021). Technology-assisted vocabulary learning for EFL learners: A meta-analysis. *Journal of Research on Educational Effectiveness, 14*(3), 645–667. <https://doi.org/10.1080/19345747.2021.1917028>

Huang, S., Wilson, V., & Eslami, Z. (2012). The effects of task involvement load on L2 incidental vocabulary learning: A meta‐analytic study. *The Modern Language Journal, 96*(4), 544–557. <https://doi.org/10.1111/j.1540-4781.2012.01394.x>

In’nami, Y., Hijikata, Y., Koizumi, R. (2021). Working memory capacity and L2 reading: A meta-analysis. *Studies in Second Language Acquisition*, 1–26. <https://doi.org/10.1017/S0272263121000267>

Jackson, D. O., & Suethanapornkul, S. (2013). The cognition hypothesis: A synthesis and meta-analysis of research on second language task complexity. *Language Learning, 63*(2), 330–367. <https://doi.org/10.1111/lang.12008>

Jeon, E. H., & Yamashita, J. (2014). L2 reading comprehension and its correlates: A meta-analysis. *Language Learning, 64*(1), 160–212. <https://doi.org/10.1111/lang.12034>

Jia, C., & Hew, K. F. (2021). Toward a set of design principles for decoding training: A systematic review of studies of English as a foreign/second language listening education. *Educational Research Review, 33,* 100392. <https://doi.org/10.1016/j.edurev.2021.100392>

Johnson, M. D. (2017). Cognitive task complexity and L2 written syntactic complexity, accuracy, lexical complexity, and fluency: A research synthesis and meta-analysis. *Journal of Second Language Writing, 37*, 13-38. <http://dx.doi.org/10.1016/j.jslw.2017.06.001>

Kang, E. Y., Sok, S., & Han, Z. (2019). Thirty-five years of ISLA on form-focused instruction: A meta-analysis. *Language Teaching Research, 23*(4), 428–453. <https://doi.org/10.1177/1362168818776671>

Kang, E., & Han, Z. (2015). The efficacy of written corrective feedback in improving L2 written accuracy: A meta-analysis. *The Modern Language Journal,* 99(1), 1-18. <https://doi.org/10.1111/modl.12189>

Kim, S. K., & Webb, S. (2022). The effects of spaced practice on second language learning: A meta-analysis. *Language Learning, 72*(1), 269–319. <https://doi.org/10.1111/lang.12479>

Kim, S. K., Lee, J. H., & Lee, H. (2020). The relative effects of L1 and L2 glosses on L2 learning: A meta-analysis. Language Teaching Research, ﻿1–22. <https://doi.org/10.1177/1362168820981394>

Kostromitina, M., & Plonsky, L. (2021). Elicited imitation tasks as a measure of L2 proficiency: A meta-analysis. *Studies in Second Language Acquisition,* 1–26. <https://doi.org/10.1017/S0272263121000395>

Lee, H., Warschauer, M., & Lee, J. H. (2018). The effects of corpus use on second language vocabulary learning: A multilevel meta-analysis. *Applied Linguistics,* 1–34. <https://doi.org/10.1093/applin/amy012>

Lee, J., Jang, J., & Plonsky, L. (2015). The effectiveness of second language pronunciation instruction: A meta-analysis. *Applied Linguistics, 36*(3), 345–366. <https://doi.org/10.1093/applin/amu040>

Lee, S., Kuo, L.-J., Xu, Z., & Hu, X. (2020). The effects of technology-integrated classroom instruction on K-12 English language learners’ literacy development: A meta-analysis. *Computer Assisted Language Learning*. <https://doi.org/10.1080/09588221.2020.1774612>

Lee, S.-K., Huang, H.-T. (2008). Visual input enhancement and grammar learning: A meta-analytic review. *Studies in Second Language Acquisition, 30,* 307–331. <https://doi.org/10.1017/S0272263108080479>

Lee, S.-M. (2021). The effectiveness of machine translation in foreign language education: A systematic review and meta-analysis. *Computer Assisted Language Learning.* <https://doi.org/10.1080/09588221.2021.1901745>

Li, J.-T., Tong, F., Irby, B. J., Lara-Aleco, R., & Rivera, H. (2021). The effects of four instructional strategies on English learners’ English reading comprehension: A meta-analysis. *Language Teaching Research,* ﻿1–22. <https://doi.org/10.1177/1362168821994133>

Li, R. (2022). Foreign language reading anxiety and its correlates: A meta-analysis. *Reading and Writing, 35,* 995–1018. <https://doi.org/10.1007/s11145-021-10213-x>

Li, S. (2010). The effectiveness of corrective feedback in SLA: A meta-analysis. *Language Learning, 60*(2), 309–365. <https://doi.org/10.1111/j.1467-9922.2010.00561.x>

Li, S. (2015). The associations between language aptitude and second language grammar acquisition: A meta-analytic review of five decades of research. *Applied Linguistics, 36*(3), 385–408. <https://doi.org/10.1093/applin/amu054>

Li, S. (2016). The construct validity of language aptitude: A meta-analysis. *Studies in Second Language Acquisition , 38 ,* 801–842. <https://doi.org/10.1017/S027226311500042X>

Lin, H. (2014). Establishing an empirical link between computer-mediated communication (CMC) and SLA: A meta-analysis of the research. *Language Learning & Technology, 18*(3), 120-147. <http://llt.msu.edu/issues/october2014/lin.pdf>

Lin, H. (2015). A meta-synthesis of empirical research on the effectiveness of computer-mediated communication (CMC) in SLA. *Language Learning & Technology, 19*(2), 85–117. <http://llt.msu.edu/issues/june2015/lin.pdf>

Lin, H. (2015). Computer-mediated communication (CMC) in L2 oral proficiency development: A meta-analysis. *ReCALL, 27*(3), 261–287. <https://doi.org/10.1017/S095834401400041X>

Lin, J.-J., & Lin, H. (2019). Mobile-assisted ESL/EFL vocabulary learning: A systematic review and meta-analysis. *Computer Assisted Language Learning,* 32(8), 878–919. <https://doi.org/10.1080/09588221.2018.1541359>

Lin, W.-C., Huang, H.-T., Liou, H.-C. (2013). The effects of text-based SCMC on SLA: A meta-analysis. *Language Learning & Technology, 17*(2), 123–142. <http://llt.msu.edu/issues/june2013/linetal.pdf>

Linck, J. A., Osthus, P., Koeth, J. T., & Bunting, M. F. (2014). Working memory and second language comprehension and production: A meta-analysis. *Psychonomic Bulletin & Review, 21*, 861–883. <https://doi.org/10.3758/s13423-013-0565-2>

Ludwig, C., Guo, K., Georgiou, G. K. (2019). Are reading interventions for English language learners effective? A meta-analysis. *Journal of Learning Disabilities, 52*(3), 220–231. <https://doi.org/10.1177%2F0022219419825855>

Lv, X., Ren, W., & Xie, Y. (2021). The effects of online feedback on ESL/EFL writing: A meta-analysis. *The Asia-Pacific Education Researcher, 30*(6), 643–653. <https://doi.org/10.1007/s40299-021-00594-6>

Lyster, R., & Saito, K. (2010). Oral feedback in classroom SLA: A meta-analysis. *Studies in Second Language Acquisition, 32*, 265–302. <https://doi.org/10.1017/S0272263109990520>

Mahdi, H. S. (2018). Effectiveness of mobile devices on vocabulary learning: A meta-analysis. *Journal of Educational Computing Research, 56*(1), 134–154. <https://doi.org/10.1177/0735633117698826>

Masgoret, A.-M., & Gardner, R. C. (2003). Attitudes, motivation, and second language learning: A meta-analysis of studies conducted by Gardner and associates. *Language Learning, 53*(1), 123–163. <https://doi.org/10.1111/1467-9922.00227>

McAndrews, M. (2019). Short periods of instruction improve learners’ phonological categories for L2 suprasegmental features. *System, 82*, 151–160. <https://doi.org/10.1016/j.system.2019.04.007>

McKay, T. H., Teimouri, Y., Sağdıç, A., Salen, B., Reagan, D., & Malone, M. E. (2021). The cagey C-test construct: Some evidence from a meta-analysis of correlations coefficients. *System, 99,* 102526. <https://doi.org/10.1016/j.system.2021.102526>

Melby-Lervåg, M., & Lervåg, A. (2011). Cross-linguistic transfer of oral language, decoding, phonological awareness and reading comprehension: A meta-analysis of the correlational evidence. *Journal of Research in Reading, 34*(1), 114–135. <https://doi.org/10.1111/j.1467-9817.2010.01477.x>

Melby-Lervåg, M., & Lervåg, A. (2014). Reading comprehension and its underlying components in second-language learners: A meta-analysis of studies comparing first- and second-language learners. *Psychological Bulletin, 140*(2), 409–433. <https://doi.org/10.1037/a0033890>

Moshen, M. A. (2022). Computer-mediated corrective feedback to improve L2 writing skills: A meta-analysis. *Journal of Educational Computing Research.* <https://doi.org/10.1177/07356331211064066>

Nakanishi, T. (2015). A meta-analysis of extensive reading research. *TESOL Quarterly, 49*(1) 6–37. <https://doi.org/10.1002/tesq.157>

Norris, J. M., & Ortega, L. (2000). Effectiveness of L2 instruction: A research synthesis and quantitative meta-analysis. *Language Learning, 50*(3), 417–528. <https://doi.org/10.1111/0023-8333.00136>

Peng, H., Jager, S., & Wander, L. (2021). Narrative review and meta-analysis of MALL research on L2 skills. *ReCALL, 33*(3), 278–295. <https://doi.org/10.1017/S0958344020000221>

Perez, M. M., Van Den Noortgate, W., & Desmet, P. (2013). Captioned video for L2 listening and vocabulary learning: A meta-analysis. *System, 41*(3), 720–739. <https://doi.org/10.1016/j.system.2013.07.013>

Plonsky, L. (2011). The effectiveness of second language strategy instruction: A meta-analysis. *Language Learning, 61*(4), 993–1038. <https://doi.org/10.1111/j.1467-9922.2011.00663.x>

Plonsky, L., & Ziegler, N. (2016). The CALL–SLA interface: Insights from a second-order synthesis. *Language learning & Technology, 20*(2), 17–37. <http://llt.msu.edu/issues/june2016/plonskyziegler.pdf>

Plonsky, L., Marsden, E., Crowther, D., Gass, S. M., & Spinner, P. (2020). A methodological synthesis and meta-analysis of judgment tasks in second language research. *Second Language Research, 36*(4), 583–621. <https://doi.org/10.1177/0267658319828413>

Qureshi, M. A. (2016). A meta-analysis: Age and second language grammar acquisition. *System, 60*, 147–160. <http://dx.doi.org/10.1016/j.system.2016.06.001>

Ramezanali, N., Uchihara, T., & Faez, F. (2021). Efficacy of multimodal glossing on second language vocabulary learning: A meta-analysis. *TESOL Quarterly, 55*(1), 105–133. <https://doi.org/10.1002/tesq.579>

Ross, S. (1998). Self-assessment in second language testing: A meta-analysis and analysis of experiential factors. *Language Testing, 15*(1), 1–20. <https://doi.org/10.1177/026553229801500101>

Saito, K. (2021). That characterizes comprehensible native-like pronunciation among English-as-a-second-language speakers? Meta-analyses of phonological, rater, and instructional factors. *TESOL Quarterly, 55*(3), 866–900. <https://doi.org/10.1002/tesq.3027>

Saito, K., & Plonsky, L. (2019). Effects of second language pronunciation teaching revisited: A proposed measurement framework and meta-analysis. *Language Learning, 69*(3), 652–708. <https://doi.org/10.1111/lang.12345>

Sakai, M., & Moorman, C. (2017). Can perception training improve the production of second language phonemes? A meta-analytic review of 25 years of perception training research. *Applied Psycholinguistics, 39*(1), 187–224. <https://doi.org/10.1017/S0142716417000418>

Schenck, A. (2017). Learning to improve grammar instruction through comprehensive analysis of past research. *International Review of Applied Linguistics in Language Teaching, 55*(2), 165–195. <http://dx.doi.org/10.1515/iral-2015-0038>

Schenck, A. (2021). Defining grammatical difficulty to make better choices about corrective feedback: A meta-analysis of Persian EFL learners. *SAGE Open, 11*(3), 1-13. <https://doi.org/10.1177%2F21582440211047558>

Scott, K. A., Roberts, J. A., & Glennen, S. (2011). How well do children who are internationally adopted acquire language? A meta-analysis. *Journal of Speech, Language, and Hearing Research, 54*, 1153–1169. <https://doi.org/10.1044/1092-4388(2010/10-0075)>

Shahnama, M., Ghonsooly, B., & Shirvan, M. E. (2021). A meta‑analysis of relative effectiveness of flipped learning in English as second/foreign language research. *Educational Technology Research and Development, 69,* 1355–1386.<https://doi.org/10.1007/s11423-021-09996-1>

Shin, J. (2020). A meta-analysis of the relationship between working memory and second language reading comprehension: Does task type matter? *Applied Psycholinguistics, 41*(4),873–900. <https://doi.org/10.1017/S0142716420000272>

Shintani, N. (2014). The effectiveness of processing instruction and production-based instruction on L2 grammar acquisition: A meta-analysis. *Applied Linguistics, 36*(3), 306–325. <https://doi.org/10.1093/applin/amu067>

Shintani, N., Li, S., & Ellis, R. (2013). Comprehension-based versus production-based grammar instruction: A meta-analysis of comparative studies. *Language Learning, 63*(2), 296–329. <https://doi.org/10.1111/lang.12001>

Shirvan, M. E., Khajavy, G. H., MacIntyre, P. D., & Taherian, T. (2019). A meta-analysis of L2 willingness to communicate and its three high-evidence correlates. *Journal of Psycholinguistic Research, 48,* 1241–1267. <https://doi.org/10.1007/s10936-019-09656-9>

Spada, N., & Tomita, Y. (2010). Interactions between type of instruction and type of language feature: A meta-analysis. *Language Learning, 60*(2), 263–308. <https://doi.org/10.1111/j.1467-9922.2010.00562.x>

Stevens, J. R., & Taylor, A. M. (2009). Hierarchical dependence in meta-analysis. *Journal of Educational and Behavioral Statistics, 34*(1), 46–73. <https://doi.org/10.3102/1076998607309080>

Suzuki, S., Kormos, J., & Uchihara, T. (2021). The relationship between utterance and perceived fluency: A meta-analysis of correlational studies. *The Modern Language Journal, 105*(2), 435–463. <https://doi.org/10.1111/modl.12706>

Taylor, A. M. (2021). Technology and reading: The effects of CALL glossing. *Psychological Reports, 124*(5), 2092–2118. <https://doi.org/10.1177/0033294120954139>

Teimouri, Y., Goetze, J., & Plonsky, L. (2019) Second language anxiety and achievement: A meta-analysis. *Studies in Second Language Acquisition, 41*(2), 363–387. <https://doi.org/10.1017/S0272263118000311>

Thompson, C. G., & von Gillern, S. (2020). Video-game based instruction for vocabulary acquisition with English language learners: A Bayesian meta-analysis. *Educational Research Review, 30*, 100332. <https://doi.org/10.1016/j.edurev.2020.100332>

Truscott, J. (2007). The effect of error correction on learners’ ability to write accurately. *Journal of Second Language Writing, 16*, 255–272. <https://doi.org/10.1016/j.jslw.2007.06.003>

Tsai, Y.-L., & Tsai, C.-C. (2018). Digital game-based second-language vocabulary learning and conditions of research designs: A meta-analysis study. *Computers and Education, 125,* 345–357. <https://doi.org/10.1016/j.compedu.2018.06.020>

Tseng, W.-T., Chen, S., Wang, S.-P., Cheng, H.-F., Yang, P.-S., & Gao, X. A. (2022). The effects of MALL on L2 pronunciation learning: A meta-analysis. *Journal of Educational Computing Research*. <https://doi.org/10.1177/07356331211058662>

Tseng, W.-T., Liu, Y.-T., Hsu, Y.-T., Chu, H.-C. (2021). Revisiting the effectiveness of study abroad language programs: A multi-level meta-analysis. *Language Teaching Research.* <https://doi.org/10.1177/1362168820988423>

Uchihara, T., Webb., S., & Yanagisawa, A. (2019). The effects of repetition on incidental vocabulary learning: A meta-analysis of correlational studies. *Language Learning, 69*(3), 559*–*599. <https://doi.org/10.1111/lang.12343>

Vitta, J. P., & Al-Hoorie, A. H. (2020). The flipped classroom in second language learning: A meta-analysis. *Language Teaching Research*. <https://doi.org/10.1177/1362168820981403>

von Hagen, A., Kohnen, S. & Stadie, N. (2021). Foreign language attainment of children/adolescents with poor literacy skills: A systematic review and meta-analysis. *Educational Psychology Review, 33*, 459–488. <https://doi.org/10.1007/s10648-020-09566-6>

Wang, C., & Sun, T. (2020). Relationship between self-efficacy and language proficiency: A meta-analysis. *System, 95,* 102366. <https://doi.org/10.1016/j.system.2020.102366>

Webb, S., Yanagisawa, A., & Uchihara, T. (2020). How effective are intentional vocabulary-learning activities? A meta-analysis. *The Modern Language Journal, 104*(4), 715–738. <https://doi.org/10.1111/modl.12671>

Xu, Y. (2019). Changes in interlanguage complexity during study abroad: A meta-analysis. *System, 80,* 199–211. <https://doi.org/10.1016/j.system.2018.11.008>

Xu, Z., Banerjee, M., Ramirez, G., Zhu, G., & Wijekumar, K. K. (2019) The effectiveness of educational technology applications on adult English language learners’ writing quality: A meta-analysis. *Computer Assisted Language Learning, 32*(1-2), 132-162. <https://doi.org/10.1080/09588221.2018.1501069>

Yan, X., Maeda, Y., Lv, J., & Ginther, A. (2016). Elicited imitation as a measure of second language proficiency: A narrative review and meta-analysis. *Language Testing, 33*(4), 497–528. <https://doi.org/10.1177/0265532215594643>

Yanagisawa, A., & Webb, S. (2021). To what extent does the involvement load hypothesis predict incidental L2 vocabulary learning? A meta-analysis. *Language Learning, 71*(2), 487–536. <https://doi.org/10.1111/lang.12444>

Yanagisawa, A., Webb, S.. & Uchihara, T. (2020). How do different forms of glossing contribute to L2 vocabulary learning from reading? A meta-regression analysis. *Studies in Second Language Acquisition, 42,* 411–438. <https://doi.org/10.1017/S0272263119000688>

Yousefi, M., & Mahmoodi, M. H. (2022). The L2 motivational self-system: A meta-analysis approach. *International Journal of Applied Linguistics*. <https://doi.org/10.1111/ijal.12416>

Yu, A., & Trainin, G. (2022). A meta-analysis examining technology-assisted L2 vocabulary learning. *ReCALL, 34*(2), 235–252. <https://doi.org/10.1017/S0958344021000239>

Yun, J. (2011). The effects of hypertext glosses on L2 vocabulary acquisition: a meta-analysis. *Computer Assisted Language Learning, 24*(1), 39–58. <http://dx.doi.org/10.1080/09588221.2010.523285>

Zhang, C., & Ma, R. (2021). The effect of textual glosses on L2 vocabulary acquisition: A meta-analysis. *Language Teaching Research,* ﻿1–20. <https://doi.org/10.1177/13621688211011511>

Zhang, S., & Zhang, X. (2020). The relationship between vocabulary knowledge and L2 reading/listening comprehension: A meta-analysis. *Language Teaching Research.* <https://doi.org/10.1177/1362168820913998>

Zhang, S., Xu, H., & Zhang, X. (2021). The effects of dictionary use on second language vocabulary acquisition: A meta-analysis. *International Journal of Lexicography, 34*(1), 1–38. <https://doi.org/10.1093/ijl/ecaa010>

Zhang, X. (2019). Foreign language anxiety and foreign language performance: A meta‐analysis. *The Modern Language Journal, 103*(4), 763–781. <https://doi.org/10.1111/modl.12590>

Zhang, X., Lau, C., & Su, Y. (2021). Home environment and development of English as a second/foreign language for young children in Asian contexts: A systematic review and meta-analysis. *Early Education and Development.* <https://doi.org/10.1080/10409289.2021.1981065>

Ziegler, N. (2016). Synchronous computer-mediated communication and interaction: A meta-analysis. *Studies in Second Language Acquisition, 38*(3), 553–586. <https://doi.org/10.1017/S027226311500025X>
